## **Burden and risk factors for Achilles tendon rupture in the military population from 2006 to 2015: A retrospective cohort study.**

John J. Fraser, DPT, PhD, FACSM\*<sup>1</sup>

email: john.j.fraser8.mil@health.mil; phone: (757) 438-0390; ORCID: 0000-0001-9697-3795;  
Twitter/Med-Mastodon: @NavyPT

Jennifer A. Zellers, DPT, PhD<sup>2,3</sup>

email: jzellers@wustl.edu; phone: (314) 286-1436

Christopher K Sullivan, MD<sup>4</sup>

email: christopher.k.sullivan5.mil@health.mil; phone: (619) 532-8429

Cory F. Janney, MD<sup>4</sup>

email: cory.f.janney.mil@health.mil; phone: (619) 532-8429

1. Operational Readiness and Health Directorate, Naval Health Research Center, 140 Sylvester Road, San Diego, CA 92106-3521, USA

2. Program in Physical Therapy, Washington University School of Medicine in St. Louis, 4444 Forest Park Avenue, St. Louis, MO 63108, USA

3. Department of Orthopaedic Surgery, Washington University School of Medicine in St. Louis, 660 S. Euclid Avenue, St. Louis, MO 63110, USA

4. Department of Orthopedic Surgery, Naval Medical Center San Diego, 34800 Bob Wilson Drive, San Diego, CA 92134, USA

**\*Correspondence to:** John J. Fraser, Operational Readiness and Health Directorate, Naval Health Research Center, 140 Sylvester Road, San Diego, CA 92106-3521, USA. email: john.j.fraser8.mil@health.mil; Twitter: @NavyPT

**Disclaimer:** JJF, CKS, and CJF are military service members or employees of the U.S. Government. This work was prepared as part of their official duties. Title 17, U.S.C. §105 provides that copyright protection under this title is not available for any work of the U.S. Government. Title 17, U.S.C. §101 defines a U.S. Government work as work prepared by a military service member or employee of the U.S. Government as part of that person's official duties. The views expressed in this article are those of the authors and do not necessarily reflect the official policy or position of the Department of the Navy, Department of Defense, nor the U.S. Government. The study protocol was approved by the Naval Health Research Center Institutional Review Board in compliance with all applicable federal regulations governing the protection of human subjects. Research data were derived from approved Naval Health Research Center Institutional Review Board protocol, number NHRC.2020.0207-NHSR

**Author Contributions:** JJF, JAZ, and CKS contributed to the drafting of this manuscript. JJF contributed to the conception, study design, data acquisition, and analysis. All authors contributed to data interpretation, critical revision, and final approval of the study.

**Conflict of Interest Statement:** Dr. Fraser reports grants from Congressionally Directed Medical Research Programs and the Office of Naval Research, outside of the submitted work. In addition, Dr. Fraser has a patent pending for an Adaptive and Variable Stiffness Ankle Brace, U.S. Provisional Patent Application No. 63254,474.

1 **Burden and risk factors for Achilles tendon rupture in the military population from 2006**  
2 **to 2015: A retrospective cohort study**

3

4 **ABSTRACT**

5 **Background:** Achilles tendon rupture (ATR) is a serious musculoskeletal injury that results in  
6 substantial functional decline, especially in highly physically demanding occupations such as  
7 service in the military

8 **Purpose:** The objective of this study was to evaluate the burden and associated factors of ATR  
9 in US military service members.

10 **Study Design:** Descriptive Epidemiology Study

11 **Methods:** The Defense Medical Epidemiology Database was used to identify all diagnosed ATR  
12 in military personnel from 2006 to 2015. Prevalence of ATR was calculated and compared by  
13 year, service branch, and military rank. Unadjusted and adjusted assessments of injury risk were  
14 calculated.

15 **Results:** Officers incurred 15 978 episodes at a prevalence of 7.43/1000 (male: 8.11/1000;  
16 female: 3.89/1000). Among enlisted personnel, there were 59 242 episodes of ATR that occurred  
17 at a prevalence of 6.23 episodes per 1000 (male enlisted: 6.49/1000; female enlisted: 4.48/1000).  
18 Apart from enlisted aviation specialists (where there was no significant difference in risk  
19 between men and women), both female officers and enlisted service members had significantly  
20 lower risk of ATR compared with their male counterparts in all occupations (prevalence ratio  
21 [PR]: 0.26-0.73). Aviation and service officers demonstrated significantly lower risk of ATR  
22 episodes (PR: 0.87-0.91) and administration, operations, intelligence, and logistic officers  
23 demonstrated increased risk (PR: 1.16-1.31) compared with ground and naval gunfire officers.  
24 Among enlisted specialties, all but mechanized/armor and combat engineers had significantly

25 higher risk of ATR risk compared with infantry (PR: 1.14-2.13), with the highest risk observed  
26 in the administration, intelligence, and communication fields.

27 **Conclusions:** ATR was ubiquitous in the US military, with multiple risk factors identified,  
28 including male sex, older age, rank, military occupation, and service branch.

29 **Clinical Relevance:** Based on the burden of ATR in the US military observed in this study, these  
30 findings highlight both the need for prophylactic interventions and identification of the  
31 populations who can most greatly benefit from preventive screening and care.

32

33 **Key Terms:** leg injuries, military personnel, occupational injuries, sports medicine, public health

34

35 **What is known about the subject:** In an earlier study of the ATR burden in US military  
36 members, 1441 ATR cases were identified between 1998 and 2001, occurring at a rate of 30.9  
37 per 100 000 person-years. In a more recent study of care episodes for Achilles tendinopathy in  
38 the military, the prevalence was 17.65 per 1000 in officers and 12.22 per 1000 in enlisted  
39 members, with male sex, older age, senior rank, military occupation, and service branch found to  
40 be salient associated factors. It is highly plausible that occupation may also be a salient factor for  
41 ATR, given that tendinopathy may be a prodromal sign of future tendon failure.

42 **What this study adds to existing knowledge:** Due to the changes in operational requirements,  
43 training, engagement in overseas contingency operations, and force composition that have  
44 occurred over the past 22 years, this provides an updated assessment of burden and the  
45 associated risk factors of ATR.

46

47

## 48 INTRODUCTION

49 The Achilles tendon, also known as the calcaneal tendon, has an important role in propulsion,  
50 force attenuation, and energy return during walking, running, and jumping during function.  
51 Achilles tendon rupture (ATR) is a serious musculoskeletal injury that results in substantial  
52 functional decline, especially in highly physically demanding occupations such as service in the  
53 military.<sup>1</sup> In the general public, ATR affects an estimated 32 906 individuals in the US per year,  
54 at an overall rate of 2.1 per 100 000 person-years.<sup>2</sup> Some of the risk factors associated with ATR  
55 include previous musculoskeletal injury, chronic Achilles tendon inflammation and  
56 tendinopathy, regular participation in athletic activity, spring season, genetic factors, chronic  
57 systemic conditions (diabetes, hyperparathyroidism, and renal failure), and medication use  
58 (steroids, quinolones, and oral bisphosphonate).<sup>3</sup> ATR management includes both conservative  
59 and surgical approaches, with return to sport occurring in 80% of affected athletes<sup>4</sup> and return to  
60 duty in 90-100% of affected military members.<sup>1,5</sup> Among military members, rehabilitation takes  
61 an average of 8.2 months in nonoperative cases<sup>1</sup> and 5.4 to 6.7 months following surgery<sup>1,5</sup>  
62 before they are cleared for return to full, unrestricted duty.

63 In an earlier study of the ATR burden in US military members, 1441 ATR cases were  
64 identified between 1998 and 2001, occurring at a rate of 30.9 per 100 000 person-years.<sup>6</sup> The 15-  
65 fold higher burden in the military may in part be due to the unique exposures incurred during  
66 military service. In a more recent study of care episodes for Achilles tendinopathy in the  
67 military, the prevalence was 17.65 per 1000 in officers and 12.22 per 1000 in enlisted members,  
68 with male sex, older age, senior rank, military occupation, and service branch found to be salient  
69 associated factors.<sup>7</sup> It is highly plausible that occupation may also be a salient factor for ATR,  
70 given that tendinopathy may be a prodromal sign of future tendon failure. Due to the changes in

71 operational requirements, training, engagement in overseas contingency operations, and force  
72 composition that have occurred over the past 22 years, an updated assessment of burden and the  
73 associated risk factors of ATR is warranted. Therefore, the purpose of this study was to  
74 determine the burden of ATR in the military population with consideration of military  
75 occupation and identify risk factors that may contribute to this condition.

76

## 77 **METHODS**

78 A population-based epidemiological retrospective cohort study of all service members in the US  
79 Armed Forces was performed, assessing sex, military occupation, rank, branch, and year on ATR  
80 prevalence from 2006 to 2015. The Defense Medical Epidemiology Database (DMED; Defense  
81 Health Agency, Falls Church, VA, <https://bit.ly/DHADMED5>) was utilized to identify relevant  
82 healthcare encounters. This database provides aggregated data for International Classification of  
83 Diseases, Ninth Revision, Clinical Modification (ICD-9-CM) codes and de-identified patient  
84 characteristics, including sex, categories of military occupations, and branch of service for all  
85 active duty and reserve military service members. The database is HIPAA compliant, does not  
86 include any personally identifiable or personal health information, and has been used previously  
87 for the epidemiological study of ankle-foot injury in the military.<sup>8,9</sup> This study was approved as  
88 non-human-subjects research by the Institutional Review Board [REDACTED]  
89 [REDACTED]. The Strengthening the Reporting of Observational Studies in  
90 Epidemiology (STROBE) guidelines<sup>10</sup> were used to guide reporting.

91 The database was queried for the number of distinct care episodes for a primary diagnosis  
92 of ATR (ICD-9-CM codes 727.67, nontraumatic rupture of the Achilles tendon, and 845.09,  
93 other sprains and strains of ankle) from 2006 to 2015. Prevalence of ATR care episodes was

94 calculated for male and female military members, enlisted and officers, in each service branch  
95 (Army, Navy, Marine Corps, and Air Force) and occupational category.<sup>8,9</sup> Prevalence ratio (PR)  
96 point estimates and 95% confidence intervals (CIs), risk difference point estimates, attributable  
97 risk, number needed to harm, and chi-square statistics were calculated in the assessment of sex  
98 and occupation category using Microsoft Excel for Mac 2016 (Microsoft Corp., Redmond, WA)  
99 and a custom epidemiological spreadsheet.<sup>11</sup> In the unadjusted assessment of sex and occupation  
100 on ATR risk, male service members, enlisted infantry, and ground/naval gunfire officer groups  
101 were used as the reference categories.

102         Due to overdispersion of the data, a negative binomial model was employed over a  
103 Poisson model for the adjusted assessment of female sex (male reference), branch (US Army  
104 reference), officer rank (enlisted reference), and year (2006 reference) on the risk of ATR.<sup>12</sup>  
105 Since there were excess zeros noted in the data, with many demographic categories not having  
106 any reported outcomes of interest (especially among the smaller subpopulations), assessment of  
107 convergence between the unadjusted and adjusted (hurdle) negative binomial regression models  
108 were performed.<sup>7</sup> In the hurdle negative binomial regression model, a logistic link is employed to  
109 remove demographic categories that contributed no episodes of ATR from the final count model.  
110 By doing so, excess zeros that contribute to skewed point estimates, standard errors, and  
111 overdispersion are parsed in the truncated regression model.<sup>12</sup> Results of hurdle negative  
112 binomial regression are reported using calculations of the predictors regressed on count data  
113 (count model assessing the rate of the outcome) as well as a linked logistic regression (zero  
114 model that assessed the probability within demographic categories of not having the outcome).  
115 Both unadjusted and adjusted models are reported in the supplemental material. The regression  
116 analyses were performed using the PSCL (version 1.5) and MASS (version 7.3-58.1) packages

117 on R (version 3.5.1, The R Foundation for Statistical Computing, Vienna, Austria). The level of  
118 significance was  $p < 0.05$  for all analyses. PR point estimates were considered statistically  
119 significant if CIs did not cross the 1.00 threshold. Convergence of  $p$  values, effect sizes, and 95%  
120 CIs were considered when evaluating significant findings.

121

## 122 **RESULTS**

123 **Supplemental tables 1 and 2** detail the counts and prevalence of ATR in officer and enlisted  
124 personnel. In the study epoch, officers incurred 15 978 episodes of ATR at a prevalence of 7.43  
125 per 1000 (male officers: 8.11 per 1000; female officers: 3.89 per 1000). Among enlisted  
126 personnel, 59 242 ATR episodes occurred at a prevalence of 6.23 episodes per 1000 (male  
127 enlisted: 6.49 per 1000; female enlisted: 4.48 per 1000). **Table 1** details the univariate factor of  
128 sex within occupational specialty on ATR episodes. Apart from enlisted aviation specialists  
129 (with no significant difference in risk was between men and women), both female officers and  
130 enlisted service members had significantly lower risk of ATR compared with their male  
131 counterparts in all occupations (PR: 0.26-0.73).

132



133  
134  
135  
TABLE 1  
Assessment of Risk of Achilles Tendon Rupture by Sex Within Occupation in Members of the  
US Armed Forces, 2006-2015<sup>a</sup>

| Occupational Specialty                           | PR          | 95% CI             | Risk Difference<br>(per 1000 person-<br>years) | AR<br>(%)     | p Value          | NNH         |
|--------------------------------------------------|-------------|--------------------|------------------------------------------------|---------------|------------------|-------------|
| Enlisted specialties                             |             |                    |                                                |               |                  |             |
| Artillery/Gunnery                                | <b>0.73</b> | <b>(0.55-0.97)</b> | -1.5                                           | <b>36.8</b>   | <b>0.03</b>      | <b>-682</b> |
| Aviation                                         | 0.92        | (0.66-1.30)        | -0.4                                           | -8.1          | 0.65             | -2641       |
| Combat Engineers                                 | <b>0.26</b> | <b>(0.08-0.82)</b> | -2.8                                           | <b>279.7</b>  | <b>0.01</b>      | <b>-357</b> |
| Maintenance                                      | <b>0.67</b> | <b>(0.63-0.70)</b> | -2.1                                           | <b>-50.1</b>  | <b>&lt;0.001</b> | <b>-488</b> |
| Administration, Intelligence, &<br>Communication | <b>0.53</b> | <b>(0.51-0.55)</b> | -4.1                                           | <b>90.0</b>   | <b>&lt;0.001</b> | <b>-243</b> |
| Logistics                                        | <b>0.70</b> | <b>(0.65-0.74)</b> | -2.1                                           | <b>-43.4</b>  | <b>&lt;0.001</b> | <b>-472</b> |
| Maritime/Naval Specialties                       | <b>0.65</b> | <b>(0.53-0.81)</b> | -2.3                                           | <b>-53.4</b>  | <b>&lt;0.001</b> | <b>-444</b> |
| Enlisted total                                   | <b>0.69</b> | <b>(0.67-0.71)</b> | -2.0                                           | <b>-44.9</b>  | <b>&lt;0.001</b> | <b>-497</b> |
| Officer specialties                              |             |                    |                                                |               |                  |             |
| Ground/Naval Gunfire                             | <b>0.73</b> | <b>(0.57-0.93)</b> | -2.0                                           | <b>-37.2</b>  | <b>0.01</b>      | <b>-497</b> |
| Aviation                                         | <b>0.41</b> | <b>(0.32-0.54)</b> | -3.9                                           | <b>-141.2</b> | <b>&lt;0.001</b> | <b>-260</b> |
| Engineering & Maintenance                        | <b>0.37</b> | <b>(0.30-0.45)</b> | -4.9                                           | <b>-172.7</b> | <b>&lt;0.001</b> | <b>-205</b> |
| Administration                                   | <b>0.37</b> | <b>(0.32-0.43)</b> | -7.2                                           | <b>-171.1</b> | <b>&lt;0.001</b> | <b>-139</b> |
| Operations & Intelligence                        | <b>0.50</b> | <b>(0.43-0.59)</b> | -4.6                                           | <b>-98.7</b>  | <b>&lt;0.001</b> | <b>-218</b> |
| Logistics                                        | <b>0.39</b> | <b>(0.33-0.46)</b> | -6.2                                           | <b>-155.4</b> | <b>&lt;0.001</b> | <b>-162</b> |
| Services                                         | <b>0.48</b> | <b>(0.44-0.53)</b> | -4.2                                           | <b>-107.3</b> | <b>&lt;0.001</b> | <b>-239</b> |
| Officer total                                    | <b>0.48</b> | <b>(0.45-0.51)</b> | -4.2                                           | <b>-108.6</b> | <b>&lt;0.001</b> | <b>-237</b> |

136 <sup>a</sup>Female service members referenced to male members. Bolded values indicate statistical significance. AR,  
137 attributable risk; CI, confidence interval; NNH, number needed to harm; PR, prevalence ratio.

138  
139  
140 In the assessment of occupational exposure, aviation and service officers demonstrated  
141 significantly lower risk of ATR episodes (PR: 0.87-0.91) and administration, operations,  
142 intelligence, and logistic officers demonstrated increased risk (PR: 1.16-1.31) compared with  
143 ground and naval gunfire officers (**Table 2**). There was no significant difference in PR between  
144 engineering and maintenance officers and the reference group. Among enlisted specialties, all  
145 but mechanized/armor and combat engineers had significantly higher ATR risk compared with  
146 infantry (PR: 1.14-2.13), with the highest risk observed in the administration, intelligence, and  
147 communication fields.

148  
149  
150  
TABLE 2  
Assessment of Risk of Achilles Tendon Rupture by Occupation in the US Armed Forces, 2006-  
2015<sup>a</sup>

| Occupational Specialty                           | PR          | 95% CI             | Risk Difference<br>(per 1000 person-<br>years) | AR<br>(%)    | <i>p</i> value   | NNH          |
|--------------------------------------------------|-------------|--------------------|------------------------------------------------|--------------|------------------|--------------|
| <b>Enlisted specialties<sup>b</sup></b>          |             |                    |                                                |              |                  |              |
| Special Operations Forces                        | <b>1.14</b> | <b>(1.01-1.28)</b> | <b>0.5</b>                                     | <b>12.0</b>  | <b>0.03</b>      | <b>2024</b>  |
| Mechanized/Armor                                 | 1.03        | (0.93-1.14)        | 0.1                                            | 3.1          | 0.55             | 8635         |
| Artillery/Gunnery                                | <b>1.48</b> | <b>(1.40-1.57)</b> | <b>1.8</b>                                     | <b>32.5</b>  | <b>&lt;0.001</b> | <b>571</b>   |
| Aviation                                         | <b>1.38</b> | <b>(1.26-1.51)</b> | <b>1.4</b>                                     | <b>27.6</b>  | <b>&lt;0.001</b> | <b>724</b>   |
| Combat Engineers                                 | 1.03        | (0.94-1.13)        | 0.1                                            | 3.1          | 0.48             | 8580         |
| Maintenance                                      | <b>1.64</b> | <b>(1.59-1.70)</b> | <b>2.3</b>                                     | <b>39.1</b>  | <b>&lt;0.001</b> | <b>428</b>   |
| Administration, Intelligence, &<br>Communication | <b>2.13</b> | <b>(2.05-2.20)</b> | <b>4.1</b>                                     | <b>53.0</b>  | <b>&lt;0.001</b> | <b>244</b>   |
| Logistics                                        | <b>1.83</b> | <b>(1.76-1.90)</b> | <b>3.0</b>                                     | <b>45.4</b>  | <b>&lt;0.001</b> | <b>331</b>   |
| Maritime/Naval Specialties                       | <b>1.67</b> | <b>(1.54-1.80)</b> | <b>2.4</b>                                     | <b>40.0</b>  | <b>&lt;0.001</b> | <b>412</b>   |
| <b>Officer specialties<sup>c</sup></b>           |             |                    |                                                |              |                  |              |
| Aviation                                         | <b>0.87</b> | <b>(0.82-0.92)</b> | <b>-1.0</b>                                    | <b>-15.0</b> | <b>&lt;0.001</b> | <b>-1041</b> |
| Engineering & Maintenance                        | 0.97        | (0.91-1.03)        | -0.2                                           | -3.2         | 0.27             | -4336        |
| Administration                                   | <b>1.31</b> | <b>(1.23-1.39)</b> | <b>2.2</b>                                     | <b>23.4</b>  | <b>&lt;0.001</b> | <b>446</b>   |
| Operations & Intelligence                        | <b>1.16</b> | <b>(1.09-1.23)</b> | <b>1.2</b>                                     | <b>13.7</b>  | <b>&lt;0.001</b> | <b>860</b>   |
| Logistics                                        | <b>1.22</b> | <b>(1.15-1.30)</b> | <b>1.6</b>                                     | <b>18.1</b>  | <b>&lt;0.001</b> | <b>617</b>   |
| Services                                         | <b>0.91</b> | <b>(0.87-0.96)</b> | <b>-0.6</b>                                    | <b>-9.5</b>  | <b>&lt;0.001</b> | <b>-1571</b> |

151 <sup>a</sup>Bolded values indicate statistical significance. AR, attributable risk; CI, confidence interval; NNH, number  
 152 needed to harm; PR, prevalence ratio.

153 <sup>b</sup>Referenced to enlisted infantry.

154 <sup>c</sup>Referenced to ground and naval gunfire officers.

155  
 156

157 **Table 3** details the results of the hurdle negative binomial regression model (adjusted for  
 158 zero inflation) assessing sex, age range, rank, branch, and year on ATR risk. When controlling  
 159 for other factors, female sex and senior officers demonstrated significantly lower PR of ATR  
 160 than the male and junior enlisted reference groups, respectively. Older age (>30 years) and  
 161 service in the US Marine Corps and Air Force were salient associated factors for increased risk  
 162 of ATR (PR: 1.17-2.50). **Supplemental table 3** compares the negative binomial models with and  
 163 without adjustment for zero inflation. While the results converged between the models for most  
 164 of the variables assessed, the hurdle model outperformed the standard negative binomial model.  
 165

166

167

TABLE 3

168 Negative Binomial Regression (Adjusted for Zero Inflation) Assessing Sex, Age, Rank, Service  
 169 Branch, and Year on Prevalence of Achilles Tendon Rupture in the US Armed Forces, 2006-  
 170 2015<sup>a</sup>

|                               | PR          | 95% CI               |             |
|-------------------------------|-------------|----------------------|-------------|
|                               |             | LL                   | UL          |
| Sex                           |             |                      |             |
| Female                        | <b>0.71</b> | <b>0.65</b>          | <b>0.79</b> |
| Age, y                        |             |                      |             |
| 20-29                         | 0.92        | 0.75                 | 1.14        |
| 30-39                         | <b>1.81</b> | <b>1.47</b>          | <b>2.23</b> |
| 40+                           | <b>2.50</b> | <b>2.01</b>          | <b>3.11</b> |
| Rank                          |             |                      |             |
| Senior enlisted               | 0.97        | 0.85                 | 1.12        |
| Junior officer                | 0.92        | 0.79                 | 1.06        |
| Senior officer                | <b>0.76</b> | <b>0.65</b>          | <b>0.89</b> |
| Service branch                |             |                      |             |
| Navy                          | 1.05        | 0.92                 | 1.19        |
| Marine Corps                  | <b>1.38</b> | <b>1.20</b>          | <b>1.58</b> |
| Air Force                     | <b>1.17</b> | <b>1.03</b>          | <b>1.33</b> |
| Year                          |             |                      |             |
| 2007                          | 0.92        | 0.75                 | 1.13        |
| 2008                          | 0.94        | 0.76                 | 1.15        |
| 2009                          | 0.91        | 0.74                 | 1.12        |
| 2010                          | 0.82        | 0.66                 | 1.01        |
| 2011                          | <b>0.79</b> | <b>0.64</b>          | <b>0.97</b> |
| 2012                          | 0.88        | 0.71                 | 1.08        |
| 2013                          | 0.94        | 0.77                 | 1.16        |
| 2014                          | 0.98        | 0.79                 | 1.20        |
| 2015                          | 1.08        | 0.88                 | 1.32        |
| Negative log-likelihood ratio |             | 2358 on 41 <i>df</i> |             |

171 <sup>a</sup>Bolded values indicate statistical significance ( $p < 0.05$ ). Reference groups: sex (male), age (18-19), rank  
 172 (junior enlisted), service branch (US Army), year (2006). CI, confidence interval, LL, lower limit; PR, prevalence  
 173 ratio; UL, upper limit.

174

175

176 **DISCUSSION**

177 This study found that ATRs were common in the US military and identified multiple salient  
 178 associated risk factors, including male sex, older age, enlisted or junior officer rank, military  
 179 occupation, and service in the US Marine Corps or Air Force. Among military occupations,  
 180 administration, operations, intelligence, and logistics specialties had the greatest risk for ATR in  
 181 both officer and enlisted personnel. Integrating our understanding from the literature on civilian

182 populations with the present study presents unique opportunities to interrogate specific aspects of  
183 mechanisms underlying ATR risk, including the contribution of exposure to activities with high  
184 Achilles tendon loads, sex, and age.

185 We found the burden of ATR more closely aligns with those previously described in the  
186 civilian population,<sup>2</sup> contrasted with the high rates previously reported in the US military.<sup>6</sup> The  
187 annual burden was consistent throughout the study epoch, despite the changes in exposure and  
188 tempo of military operations. This finding diverges from studies in the civilian population  
189 describing a progressive increased burden of ATR beginning in the 1990s and continuing to the  
190 present.<sup>13</sup> It may be that an increasingly sedentary civilian population engaged in irregular bouts  
191 of activity (“weekend warriors”) has led to increased burden of ATR over time compared with  
192 the more consistently physically active military population.

193 Findings from this study underscore the importance of activity exposure on ATR risk.  
194 Interestingly, this study supports the framework that both overloading and underloading with  
195 bouts of high loads can be detrimental to Achilles tendon health. It may seem contradictory that  
196 service in the US Marine Corps (routinely encountering high Achilles tendon loading activities)  
197 and Air Force (routinely involved in low Achilles tendon loading activities) both had increased  
198 risk of Achilles tendon rupture compared with the US Army. We posit that these two branches  
199 represent different occupational risk exposures. Individuals in the US Marine Corps are routinely  
200 engaged in high-load running and jumping tasks and may represent an “overload” mechanism  
201 contribution to ATR risk. Alternatively, individuals in the Air Force are more routinely involved  
202 in technical occupations with longer bouts of sitting interspersed with less-frequent bouts of high  
203 Achilles loading activities. This group may represent a more traditional, “underload with  
204 intermittent high loading” mechanism contributing to ATR risk. Similarly, there is a lower risk

205 of ATR in senior officers (when accounting for age), supporting the idea that individuals with  
206 high administrative loads, generally associated with longer bouts of sedentary activities without  
207 intermittent high loading bouts, have less occupational exposure to the high eccentric loads,  
208 leading to ATR.

209 A higher burden of ATR in men than in women has been well established in the civilian  
210 population, with injuries occurring 3-7 times more frequently in men.<sup>14</sup> The mechanisms  
211 underlying this sexual dimorphism is a point of ongoing study. Studies of preclinical models of  
212 the Achilles tendon have found regulation of female hormones to be an important contributor to  
213 tendon mechanical behavior in the context of maintaining homeostasis and healing.<sup>15,16</sup>  
214 Furthermore, women have been found to have greater passive dorsiflexion motion compared  
215 with men, a function of triceps surae extensibility.<sup>17</sup> Recent studies in human tendon have  
216 identified the presence of estrogen receptors in tendon tissue and estrogen effects on tendon  
217 biomechanical function, supporting the notion of sex hormone-mediated signaling in tendon.<sup>18-20</sup>  
218 Studies investigating sex-mediated differences in patient outcomes after ATR have found  
219 conflicting results, though the propensity for male patients to incur this injury more than female  
220 patients is highly consistent across studies.<sup>21-23</sup>

221 The influence of sex on tendon homeostasis and healing in humans, though, is potentially  
222 confounded by a host of factors outside of direct hormonal influence. For example, it is possible  
223 that behavioral differences between sexes relating to engaging in recreational sport activity<sup>24</sup>  
224 could partially account for differences in ATR burden, given that rupture tends to be associated  
225 with forceful eccentric contractions encountered during team sports like basketball and football.  
226 The present study informs this conversation by demonstrating that burden of ATR is higher in  
227 men than women when occupational exposure is comparable (for every occupational specialty

228 included in this study, except for enlisted aviation). However, the relative risk encountered by  
229 women compared with men was lowest in specialties in which exposures are generally  
230 considered to have lower physical demands and are more sedentary (e.g., officer specialties,  
231 particularly administrative and logistics roles). The findings of this study add support to the  
232 notion that there is a mechanism by which sex influences ATR risk, and this risk is also  
233 influenced by repeated exposure to activities in which the Achilles tendon is likely to experience  
234 higher loads.

235         Service members above the age of 30 were found to be at increased risk of ATR. This  
236 finding aligns well with prior studies of ATR in civilian and elite athlete populations, where the  
237 highest incidence occurs in individuals aged 30-50 years.<sup>13,14,25,26</sup> Individuals in middle and older  
238 age groups have also consistently been found to have less optimal functional outcomes compared  
239 with younger individuals,<sup>21,23</sup> though individuals over the age of 65 have been reported to have  
240 greater improvements in self-reported postinjury outcomes compared with younger age groups.<sup>22</sup>  
241 Identifying mechanisms underlying the isolated factor of age on ATR risk is challenging because  
242 it is often difficult to disentangle behavioral changes (increased sedentary behavior) and tendon  
243 maturation (age-related mechanical and physiological changes).<sup>27</sup> That said, it does seem that  
244 aging can have an effect on tendon cellular function and matrix composition, though regular  
245 activity mitigates many of these changes.<sup>27</sup> Similarly, aging has inconsistently been associated  
246 with reduced muscle cross-sectional area and altered Achilles tendon mechanical behavior, but  
247 these characteristics also seem to be moderated by physical activity level.<sup>27,28</sup> Reductions in  
248 muscle cross-sectional area and Achilles tendon extensibility, findings typically associated with  
249 aging, were not observed when participants were matched for height, weight, and activity level.<sup>29</sup>

250 The findings from the present study further support that the risk of ATR does not likely reflect  
251 aging alone but rather the combined effects of both age and exposure.

252 A substantial strength of this study was that using DMED allowed for assessment of  
253 population-level differences in ATR across several strata, including sex, occupation, military  
254 rank, branch of service, and year. This study also had some limitations. Using diagnostic codes  
255 has inherent weaknesses, especially in military populations where many determinants can  
256 influence care seeking.<sup>30</sup> The data used in this study only represent individuals who sought  
257 treatment for their injuries and do not include individuals who self-managed their condition,  
258 though ATR presents with substantial functional deficits that would be difficult to self-manage,  
259 mitigating concerns regarding care-seeking behavior. This study also included each occurrence  
260 of ATR as a separate care episode. Individuals with a history of ATR have been found to have  
261 increased burden of rupture on the contralateral limb compared with the general population,<sup>31</sup> so  
262 it is possible that a single person may have contributed more than one episode of care in the  
263 present study. Lastly, although personnel were categorized by their military occupation, a  
264 detailed task analysis to determine the specific duties and exposures that may be associated with  
265 these injuries was not possible.

266

## 267 **CONCLUSION**

268 ATR was ubiquitous in the US military, with multiple risk factors identified, including male sex,  
269 older age, rank, military occupation, and service branch. Based on the burden of ATR in the US  
270 military observed in this study, these findings highlight both the need for prophylactic  
271 interventions and identification of the populations who can most greatly benefit from preventive  
272 screening and care.

273

274 **REFERENCES**

- 275 1. Renninger CH, Kuhn K, Fellars T, Youngblood S, Bellamy J. Operative and Nonoperative  
276 Management of Achilles Tendon Ruptures in Active Duty Military Population. *Foot Ankle*  
277 *Int.* 2016;37(3):269-273. doi:10.1177/1071100715615322
- 278 2. Lemme NJ, Li NY, DeFroda SF, Kleiner J, Owens BD. Epidemiology of Achilles Tendon  
279 Ruptures in the United States: Athletic and Nonathletic Injuries From 2012 to 2016. *Orthop*  
280 *J Sports Med.* 2018;6(11):2325967118808238. doi:10.1177/2325967118808238
- 281 3. Xergia SA, Tsarbou C, Liveris NI, Hadjithoma M, Tzanetakou IP. Risk factors for Achilles  
282 tendon rupture: an updated systematic review. *Phys Sportsmed.* Published online June 10,  
283 2022:1-11. doi:10.1080/00913847.2022.2085505
- 284 4. Zellers JA, Carmont MR, Silbernagel KG. Return to Play Post Achilles Tendon Rupture: A  
285 Systematic Review and Meta-Analysis of Rate and Measures of Return to Play. *Br J Sports*  
286 *Med.* 2016;50(21):1325-1332. doi:10.1136/bjsports-2016-096106
- 287 5. Tropf J, Piscocoy AS, Lundy A, Nelson S, Eckel TT. No Difference in Return to Duty  
288 Between Minimally Invasive, Percutaneous Achilles Tendon Repair and Nonoperative  
289 Functional Rehabilitation in Active Duty Military Members. *Foot Ankle Orthop.*  
290 2022;7(2):2473011421S00544. doi:10.1177/2473011421S00544
- 291 6. Lum G. Spontaneous Ruptures of the Achilles Tendon, US Armed Forces, 1998-2001. *Med*  
292 *Surveill Mon Rep.* 2002;8.
- 293 7. Sullivan CK, Janney CF, Fraser JJ. Burden and risk factors for Achilles tendinopathy in the  
294 military population from 2006 to 2015. A retrospective cohort study. *J Athl Train.* 2023;(In  
295 Press).
- 296 8. MacGregor AJ, Fogleman SA, Dougherty AL, Ryans CP, Janney CF, Fraser JJ. Sex  
297 Differences in the Incidence and Risk of Ankle–Foot Complex Stress Fractures Among U.S.  
298 Military Personnel. *J Womens Health.* 2022;31(4):586-592. doi:10.1089/jwh.2021.0292
- 299 9. Fraser JJ, MacGregor AJ, Ryans CP, Dreyer MA, Gibboney MD, Rhon DI. Sex and  
300 occupation are salient factors associated with lateral ankle sprain risk in military tactical  
301 athletes. *J Sci Med Sport.* 2021;24(7):677-682. doi:10.1016/j.jsams.2021.02.016
- 302 10. von Elm E, Altman DG, Egger M, Pocock SJ, Gøtzsche PC, Vandenbroucke JP. The  
303 Strengthening the Reporting of Observational Studies in Epidemiology (STROBE)  
304 Statement: Guidelines for reporting observational studies. *Int J Surg.* 2014;12(12):1495-  
305 1499. doi:10.1016/j.ijsu.2014.07.013
- 306 11. LaMorte WW. Epidemiology/Biostatistics Tools [Excel workbook]. Published online 2006.  
307 Accessed August 3, 2019. <http://bit.ly/Lamort3>
- 308 12. Feng CX. A comparison of zero-inflated and hurdle models for modeling zero-inflated count  
309 data. *J Stat Distrib Appl.* 2021;8(1):8. doi:10.1186/s40488-021-00121-4



- 310 13. Sheth U, Wasserstein D, Jenkinson R, Moineddin R, Kreder H, Jaglal SB. The epidemiology  
311 and trends in management of acute Achilles tendon ruptures in Ontario, Canada: a  
312 population-based study of 27 607 patients. *Bone Jt J.* 2017;99-B(1):78-86.  
313 doi:10.1302/0301-620X.99B1.BJJ-2016-0434.R1
- 314 14. Lantto I, Heikkinen J, Flinkkilä T, Ohtonen P, Leppilahti J. Epidemiology of Achilles tendon  
315 ruptures: increasing incidence over a 33-year period. *Scand J Med Sci Sports.*  
316 2015;25(1):e133-138. doi:10.1111/sms.12253
- 317 15. Fryhofer GW, Freedman BR, Hillin CD, et al. Postinjury biomechanics of Achilles tendon  
318 vary by sex and hormone status. *J Appl Physiol.* 2016;121(5):1106-1114.  
319 doi:10.1152/jappphysiol.00620.2016
- 320 16. Pardes AM, Freedman BR, Fryhofer GW, Salka NS, Bhatt PR, Soslowsky LJ. Males have  
321 inferior Achilles Tendon Material Properties Compared to Females in a Rodent Model. *Ann*  
322 *Biomed Eng.* 2016;44(10):2901-2910. doi:10.1007/s10439-016-1635-1
- 323 17. Riemann BL, DeMont RG, Ryu K, Lephart SM. The Effects of Sex, Joint Angle, and the  
324 Gastrocnemius Muscle on Passive Ankle Joint Complex Stiffness. *J Athl Train.*  
325 2001;36(4):369-375.
- 326 18. Bryant AL, Clark RA, Bartold S, et al. Effects of estrogen on the mechanical behavior of the  
327 human Achilles tendon in vivo. *J Appl Physiol.* 2008;105(4):1035-1043.  
328 doi:10.1152/jappphysiol.01281.2007
- 329 19. Leblanc DR, Schneider M, Angele P, Vollmer G, Docheva D. The effect of estrogen on  
330 tendon and ligament metabolism and function. *J Steroid Biochem Mol Biol.* 2017;172:106-  
331 116. doi:10.1016/j.jsbmb.2017.06.008
- 332 20. Astill BD, Katsma MS, Cauthon DJ, et al. Sex-based difference in Achilles peritendinous  
333 levels of matrix metalloproteinases and growth factors after acute resistance exercise. *J Appl*  
334 *Physiol.* 2017;122(2):361-367. doi:10.1152/jappphysiol.00878.2016
- 335 21. Carmont MR, Zellers JA, Brorsson A, Nilsson-Helander K, Karlsson J, Grävare Silbernagel  
336 K. Age and tightness of repair are predictors of heel-rise height after Achilles tendon rupture.  
337 *Orthop J Sports Med.* 2020;8(3):2325967120909556.
- 338 22. Cramer A, Jacobsen NC, Hansen MS, Sandholdt H, Hölmich P, Barfod KW. Outcome after  
339 acute Achilles tendon rupture is not negatively affected by female sex and age over 65 years.  
340 *Knee Surg Sports Traumatol Arthrosc.* 2020;28(12):3994-4002. doi:10.1007/s00167-020-  
341 06003-7
- 342 23. Olsson N, Petzold M, Brorsson A, Karlsson J, Eriksson BI, Grävare Silbernagel K.  
343 Predictors of clinical outcome after acute Achilles tendon ruptures. *Am J Sports Med.*  
344 2014;42(6):1448-1455.
- 345 24. Rosenfeld CS. Sex-dependent differences in voluntary physical activity. *J Neurosci Res.*  
346 2017;95(1-2):279-290. doi:10.1002/jnr.23896

- 347 25. Parekh SG, Wray WH, Brimmo O, Sennett BJ, Wapner KL. Epidemiology and Outcomes of  
348 Achilles Tendon Ruptures in the National Football League. *Foot Ankle Spec.* 2009;2(6):283-  
349 286. doi:10.1177/1938640009351138
- 350 26. Houshian S, Tscherning T, Riegels-Nielsen P. The epidemiology of achilles tendon rupture  
351 in a Danish county. *Injury.* 1998;29(9):651-654. doi:10.1016/S0020-1383(98)00147-8
- 352 27. Magnusson DM, Eisenhart M, Gorman I, Kennedy VK, E. Davenport T. Adopting  
353 Population Health Frameworks in Physical Therapist Practice, Research, and Education: The  
354 Urgency of Now. *Phys Ther.* 2019;99(8):1039-1047. doi:10.1093/ptj/pzz048
- 355 28. Lazarus NR, Harridge SDR. Declining performance of master athletes: silhouettes of the  
356 trajectory of healthy human ageing? *J Physiol.* 2017;595(9):2941-2948.  
357 doi:10.1113/JP272443
- 358 29. Couppé C, Svensson RB, Grosset JF, et al. Life-long endurance running is associated with  
359 reduced glycation and mechanical stress in connective tissue. *Age Dordr Neth.*  
360 2014;36(4):9665. doi:10.1007/s11357-014-9665-9
- 361 30. Fraser JJ, Schmied E, Rosenthal MD, Davenport TE. Physical therapy as a force multiplier:  
362 population health perspectives to address short-term readiness and long-term health of  
363 military service members. *Cardiopulm Phys Ther J.* 2020;31(1):22-28.  
364 doi:10.1097/CPT.0000000000000129
- 365 31. Arøen A, Helgø D, Granlund OG, Bahr R. Contralateral tendon rupture risk is increased in  
366 individuals with a previous Achilles tendon rupture. *Scand J Med Sci Sports.* 2004;14(1):30-  
367 33. doi:10.1111/j.1600-0838.2004.00344.x

368
